# Supplementary material
Source: PubMed Central journal article supplement (PMC4853918)
Supplement: NIHMS775853-supplement-Supplemental_Content_1.pdf [file NIHMS775853-supplement-Supplemental_Content_1.pdf]

## SUPPLEMENTAL DIGITAL CONTENT 1

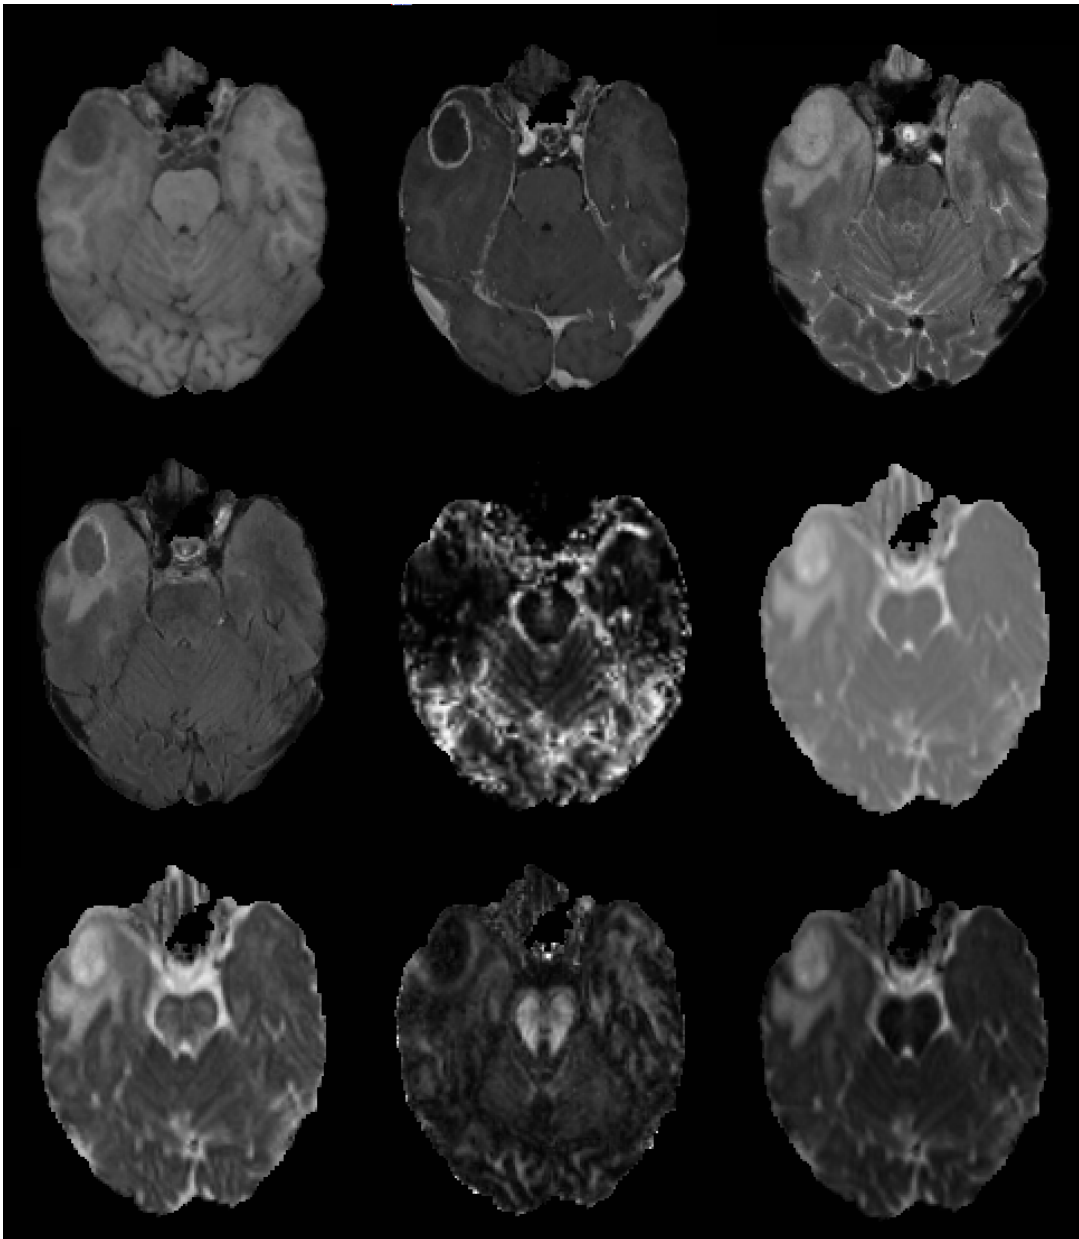

**FIGURE.** Magnetic resonance imaging (MRI) modalities. Snapshots of the preoperative images processed and used as inputs to infiltration model. **Top left to bottom right**, T<sub>1</sub>-weighted, T<sub>1</sub>-weighted contrast-enhanced, T<sub>2</sub>-weighted, fluid-attenuated inversion recovery, relative cerebral blood volume, trace, axial diffusivity, fractional anisotropy, and radial diffusivity.
