# Supplementary material
Source: PubMed Central journal article supplement (PMC4853918)
Supplement: NIHMS775853-supplement-Supplemental_Content_2.pdf [file NIHMS775853-supplement-Supplemental_Content_2.pdf]

## SUPPLEMENTAL DIGITAL CONTENT 2

### Preoperative MRI Imaging Sequence Characteristics

Preoperative magnetic resonance imaging (MRI) studies were obtained using a 3 Tesla scanner (Magnetom Tim Trio, Siemens, Erlangen, Germany). Routine sequences acquired included axial 3-D - ( $T_1$ -weighted 3-D magnetization prepared rapid acquisition gradient echo or MP-RAGE): matrix  $192 \times 256 \times 192$ , resolution  $0.98 \times 0.98 \times 1.00 \text{ mm}^3$ , repetition time (TR in ms): 1760, echo time (TE in ms) = 3.1;  $T_2$  ( $T_2$ -weighted): matrix  $208 \times 256 \times 64$ , resolution  $0.94 \times 0.94 \times 3.00$ , TR/TE 4680/85; Diffusion tensor imaging (DTI): matrix  $128 \times 128 \times 40$ , resolution  $1.72 \times 1.72 \times 3.00 \text{ mm}^3$ , 30 gradient directions with b value  $1000 \text{ s/mm}^2$  plus baseline  $b = 0 \text{ s/mm}^2$ ; Dynamic susceptibility contrast MRI (DSC-MRI): matrix  $128 \times 128 \times 20$ , resolution  $1.72 \times 1.72 \times 3 \text{ mm}^3$ , TR/TE = 2000/45, 45 time points with at least 10 baseline volumes preceding bolus arrival;  $T_2$ -fluid-attenuated inversion recovery ( $T_2$ -FLAIR): matrix  $192 \times 256 \times 60$ , resolution  $0.94 \times 0.94 \times 3.00 \text{ mm}^3$ , inversion time (TI in ms) = 2500, TR/TE = 9420/141; and axial 3-D  $T_1$ -Gad ( $T_1$ -weighted 3-D MP-RAGE post contrast): matrix  $192 \times 256 \times 192$ , resolution  $0.98 \times 0.98 \times 1.00 \text{ mm}^3$ , TR/TE = 1760/3.1. For the DSC-MRI acquisition, an initial loading dose of 0.15mL/kg of MultiHance (gadobenate dimeglumine) was administered first to help minimize errors due to potential contrast leakage out of intravascular space, and DSC-MRI data were acquired during a second bolus injection after a 5 minute delay (total of 0.3mL/kg or 1.5 times single dose). Post-processed relative blood volume (rCBV) maps were created automatically on a DynaSuite workstation ([www.invivocorp.com](http://www.invivocorp.com); Invivo, Gainesville, FL), including correction for leakage effects (reference Boxerman et al, *AJNR*, 2006). Note that FLAIR images were acquired between loading dose and DSC-MRI acquisitions and were thus a post-contrast acquisition as well. All imaging series utilized for this study were acquired in the axial plane, with total time for the imaging protocol less than 30 minutes.
