# Supplementary material
Source: PubMed Central journal article supplement (PMC4853918)
Supplement: NIHMS775853-supplement-Supplemental_Content_3.pdf [file NIHMS775853-supplement-Supplemental_Content_3.pdf]

**SUPPLEMENTAL DIGITAL CONTENT 3**

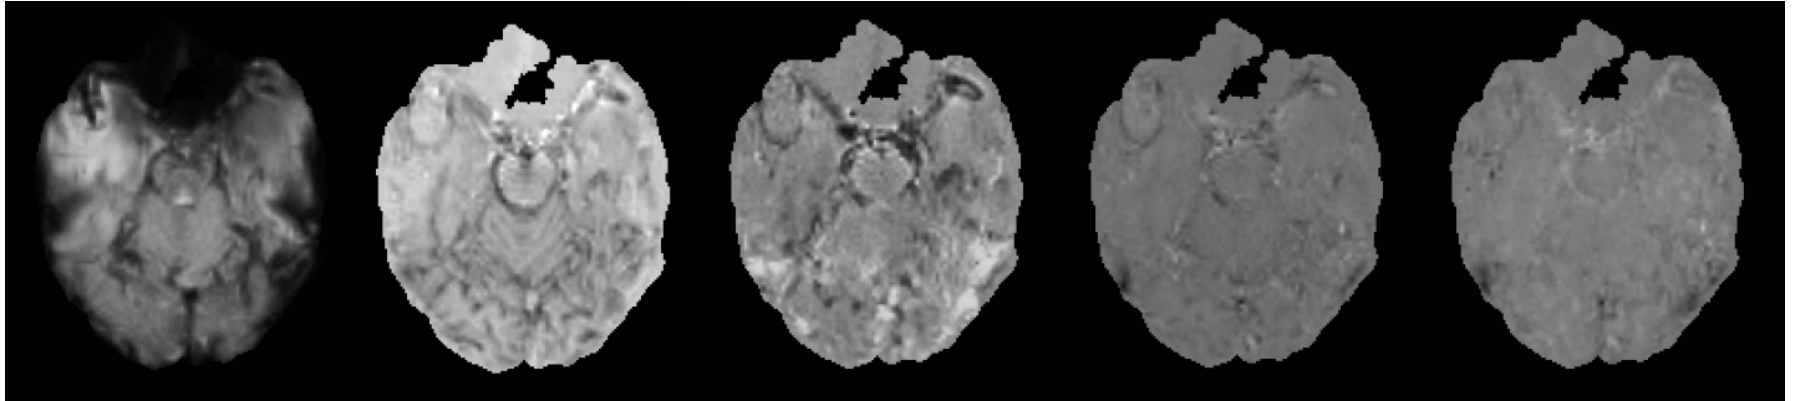

**FIGURE.** PC images. Magnetic resonance (MR) representations of the first five principal components extracted from the DSC-MRI perfusion sequence. **Left to right** shows PC1 to PC5.
