# Supplementary material
Source: PubMed Central journal article supplement (PMC4853918)
Supplement: NIHMS775853-supplement-Supplemental_Content_4.pdf [file NIHMS775853-supplement-Supplemental_Content_4.pdf]

## SUPPLEMENTAL DIGITAL CONTENT 4

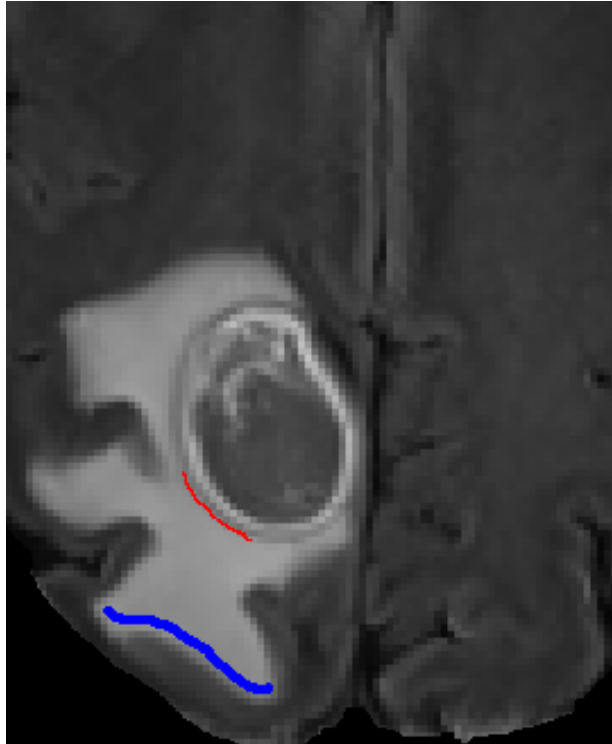

**FIGURE.** Regions of interest: Near-Far Regions of Interest. The figure depicts the near (**red**) and far (**blue**) region of interest. The red region is immediately adjacent to contrast enhancing tumor and the blue region is on the periphery of edema.
